# Supplementary material for: 3D Ti3C2Tx MXene–Matrigel with Electroacoustic Stimulation to Promote the Growth of Spiral Ganglion Neurons
Source: PubMed Central journal article supplement — ACS Nano. 2022 Oct 12;16(10):16744–56. doi: 10.1021/acsnano.2c06306 (PMC9620407; doi:10.1021/acsnano.2c06306), 2022-10-12
Supplement: nn2c06306_si_001.pdf [file nn2c06306_si_001.pdf]

# Supporting Information

1

2

## 3 **3D Ti<sub>3</sub>C<sub>2</sub>T<sub>x</sub> MXene-matrigel with electroacoustic stimulation** 4 **to promote the growth of spiral ganglion neurons**

5

6 Menghui Liao<sup>1,2,#</sup>, Yangnan Hu<sup>1,2,#</sup>, Yuhua, Zhang<sup>1</sup>, Kaichen Wang<sup>3</sup>, Qiaojun Fang<sup>1</sup>,  
7 Yanru Qi<sup>1</sup>, Yingbo Shen<sup>3</sup>, Hong Cheng<sup>1</sup>, Xiaolong Fu<sup>1</sup>, Mingliang Tang<sup>1,4,5,\*</sup>, Shan  
8 Sun<sup>6,\*</sup>, Xia Gao<sup>2,\*</sup>, Renjie Chai<sup>1,5,7,8,9,\*</sup>

9

10 <sup>1</sup> State Key Laboratory of Bioelectronics, Department of Otolaryngology Head and  
11 Neck Surgery, Zhongda Hospital, School of Life Sciences and Technology, Advanced  
12 Institute for Life and Health, Jiangsu Province High-Tech Key Laboratory for Bio-  
13 Medical Research, Southeast University, Nanjing, 210096, China.

14 <sup>2</sup> Department of Otorhinolaryngology-Head and Neck Surgery, Affiliated Drum Tower  
15 Hospital of Nanjing University Medical School, Nanjing, 210008, China.

16 <sup>3</sup> Chien-Shiung Wu College, Southeast University, Nanjing 210096, China.

17 <sup>4</sup> Institute for Cardiovascular Science & Department of Cardiovascular Surgery of the  
18 First Affiliated Hospital, Medical College, Soochow University, Suzhou, 215000,  
19 China.

20 <sup>5</sup> Co-innovation Center of Neuroregeneration, Nantong University, Nantong, 226001,  
21 China.

22 <sup>6</sup> ENT Institute and Otorhinolaryngology Department of Eye & ENT Hospital, State  
23 Key Laboratory of Medical Neurobiology and MOE Frontiers Center for Brain Science,  
24 Fudan University, Shanghai, 200031, China.

25 <sup>7</sup> Department of Otolaryngology Head and Neck Surgery, Sichuan Provincial People's  
26 Hospital, University of Electronic Science and Technology of China, Chengdu, China.

27 <sup>8</sup> Institute for Stem Cell and Regeneration, Chinese Academy of Science, Beijing, China.

28 <sup>9</sup> Beijing Key Laboratory of Neural Regeneration and Repair, Capital Medical

29 University, Beijing, 100069, China.

30

31 #These authors contributed equally to this paper.

32

33 \*Corresponding authors: Drs. Renjie Chai: [renjie@seu.edu.cn](mailto:renjie@seu.edu.cn), Xia Gao:

34 [xiagaogao@hotmail.com](mailto:xiagaogao@hotmail.com), Shan Sun: [Shansun@fudan.edu.cn](mailto:Shansun@fudan.edu.cn) and Mingliang Tang:

35 [mltang@suda.edu.cn](mailto:mltang@suda.edu.cn).

36

37 *Supplementary figures and figure legends*

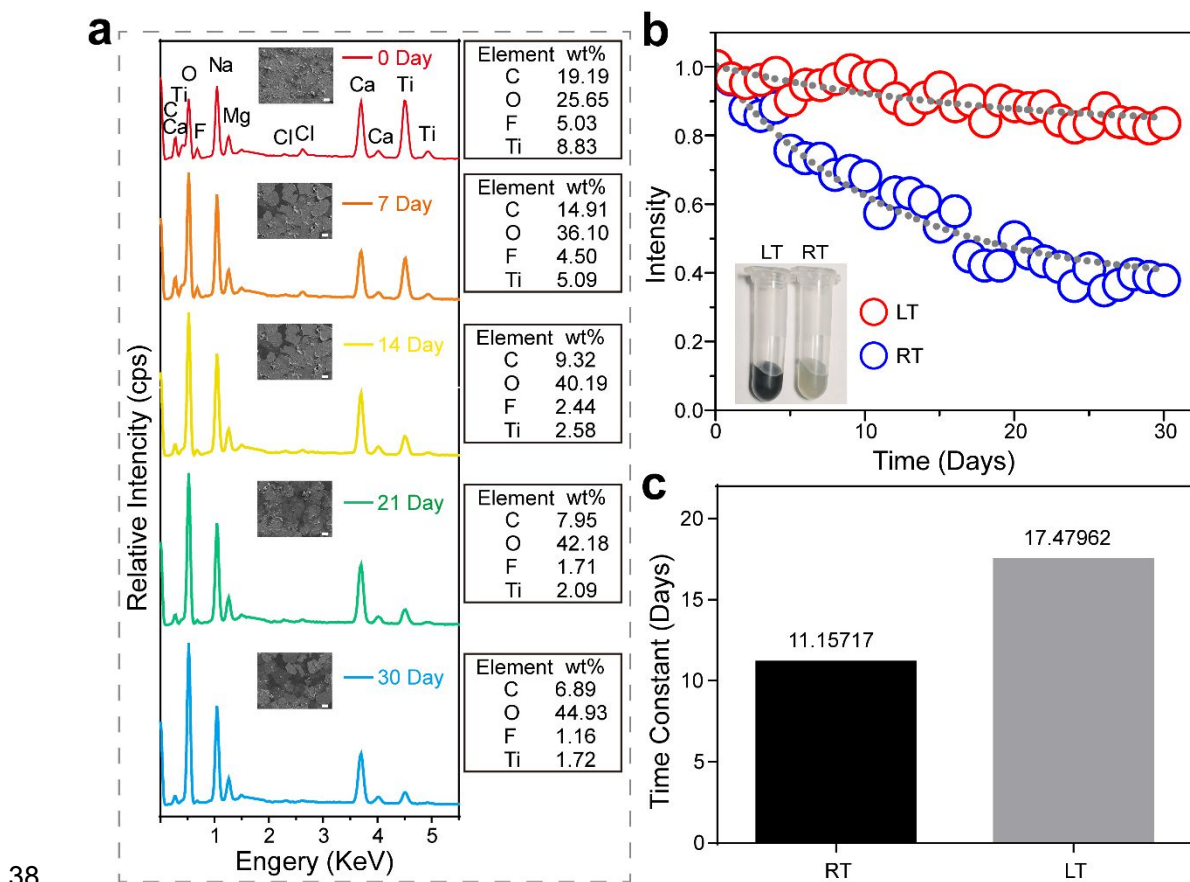

38

39 Supplementary Figure 1. The  $Ti_3C_2T_x$  MXene nanosheet degraded slowly over time.  
 40 (a) SEM-EDX results of  $Ti_3C_2T_x$  MXene stored for different times. Scale bar=2  $\mu m$ . (b)  
 41 Absorbance attenuation curve of  $Ti_3C_2T_x$  MXene aqueous solution stored at low  
 42 temperature (LT) and room temperature (RT) in the dark. The dotted lines were fitted  
 43 according to the exponential decay function  $f(x) = y_0 + Ae^{-x/\tau}$ . Lower left was the color  
 44 contrast of  $Ti_3C_2T_x$  MXene (0.3mg/mL) stored in LT and RT at day 30. (c) Time  
 45 constants of  $Ti_3C_2T_x$  MXene in LT and RT environments.

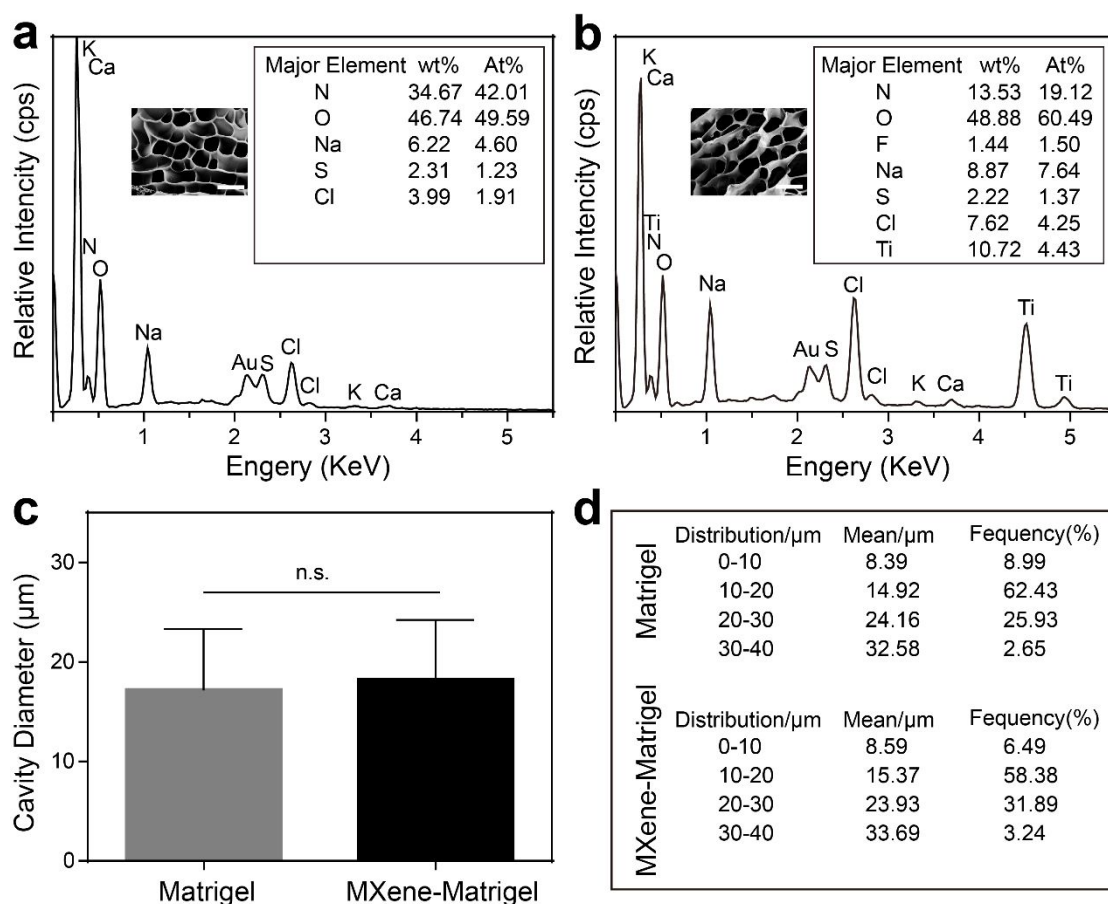

46  
 47 Supplementary Figure 2.  $Ti_3C_2T_x$  MXene was successfully integrated into the matrigel.  
 48 (a) SEM-EDX mapping of matrigel hydrogel. (b) SEM-EDX mapping of  $Ti_3C_2T_x$   
 49 MXene-matrigel hydrogel. wt%: weight percentage, At%: atom percentage. Scale  
 50 bar=20  $\mu m$ . (c) The cavity diameter of the matrigel and  $Ti_3C_2T_x$  MXene-matrigel  
 51 hydrogel. (d) Statistical results of grouping the cavity diameters of the matrigel and  
 52  $Ti_3C_2T_x$  MXene-matrigel hydrogel.

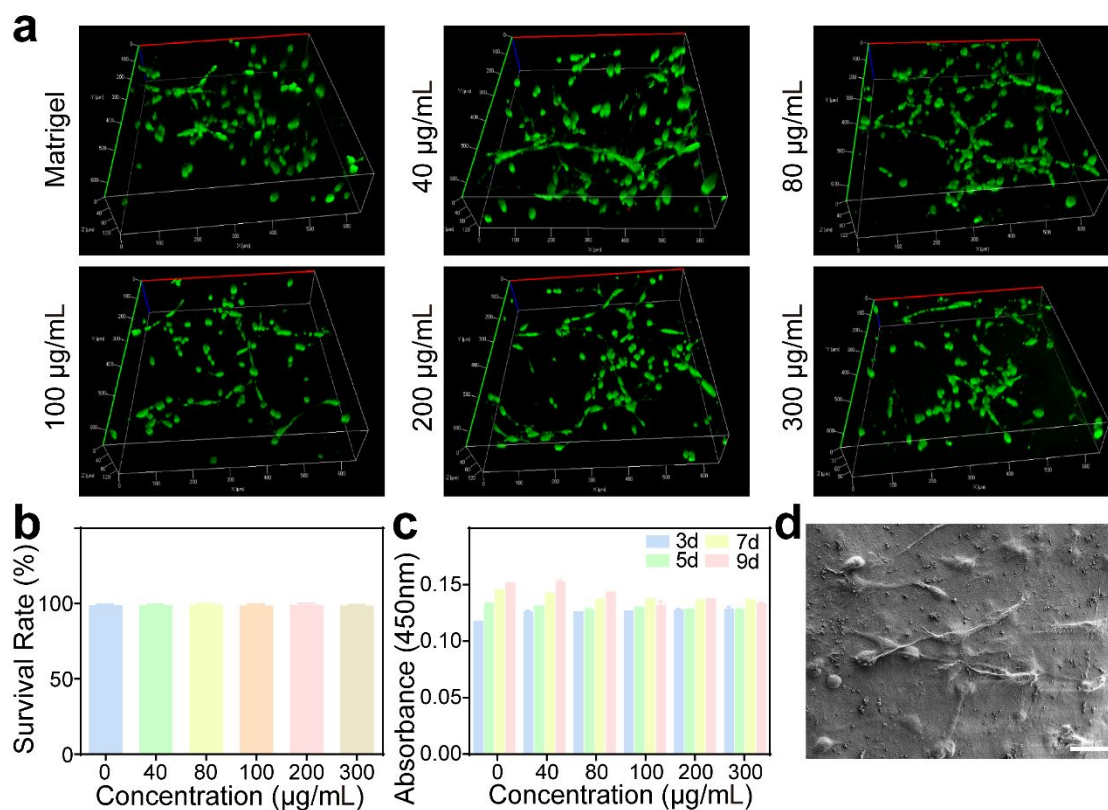

54

55 Supplementary Figure 3.  $Ti_3C_2T_x$  MXene-matrigel hydrogel was an excellent scaffold  
 56 for SGNs. (a) Representative fluorescence images of live/dead staining of SGNs  
 57 cultured in  $Ti_3C_2T_x$  MXene hydrogels with different concentrations. Entire cytoplasm  
 58 of live cell was labeled with Calcein-AM (green), and nuclei of dead cell was labeled  
 59 with EthD-1 (red). (b) The proportion of Calcein-AM positive cells. (c) The cytotoxicity  
 60 of matrigel hydrogel and  $Ti_3C_2T_x$  MXene-matrigel hydrogels with different  
 61 concentrations to SGNs from CCK-8. (d) Representative SEM image of SGNs cultured  
 62 in  $Ti_3C_2T_x$  MXene hydrogel for three days. Scale bar=20  $\mu m$ . Data are presented as  
 63 mean  $\pm$  SD.
